## P917

**Additional value of atrial parameters evaluated by echocardiography on the scales of cardioembolic risk in atrial fibrillation**

Moral S.<sup>1</sup>; Panaro A.<sup>2</sup>; Ballesteros E.<sup>3</sup>; Morales M.<sup>1</sup>; Frigola JM.<sup>1</sup>; Robles R.<sup>1</sup>; Albert X.<sup>1</sup>; Trucco E.<sup>1</sup>; Aboal J.<sup>1</sup>; Vilardell P.<sup>1</sup>; Palet J.<sup>2</sup>; Carballo J.<sup>2</sup>; Brugada R.<sup>1</sup>; Evangelista A.<sup>4</sup>

<sup>1</sup>Hospital Universitari Doctor Josep Trueta, Barcelona, Spain

<sup>2</sup>Centre Cardiovascular Sant Jordi / Hospital el Pilar, Cardiology, Barcelona, Spain

<sup>3</sup>Centre d'Atenció Primària Pare Claret, ICS., Radiology Department, Barcelona, Spain

<sup>4</sup>University Hospital Vall d'Hebron, Barcelona, Spain

**Background:** Atrial morphological parameters may influence the presence of atrial thrombus, a factor strongly associated with cardiac thromboembolism, independently of those included in the CHA2DS2-VASc risk estimation scale in patients with a history of atrial fibrillation (AF). The aim of our study was to evaluate this possible association by transthoracic echocardiography (TTE).

**Methods:** Prospective multicenter study including 401 patients with a history of AF, in which a TTE and a transesophageal echocardiogram (TEE) were performed for evaluation of atrial thrombus between 2016-2019. The parameters included in the CHA2DS2-VASc scale, the heart rhythm at the time of the study and the anticoagulant treatment performed, as well as the atrial morphological parameters were collected.

**Results:** Twenty-three patients (6%) presented with atrial thrombus in TEE. The left atrial area ( $28 \pm 6\text{cm}^2$  vs  $33 \pm 6\text{cm}^2$ ;  $p < 0.001$ ), the presence of AF during the study (83% vs 17%;  $p = 0.002$ ) and CHA2DS2-VASc ( $1.7 \pm 1.5$  vs  $3.0 \pm 1.3$ ;  $p < 0.001$ ) were associated with the presence of atrial thrombus. The left atrial area was a diagnostic predictor of atrial thrombus (area under the curve = 73%;  $p = 0.001$ ): a value  $>30\text{cm}^2$  presented a sensitivity of 79% and a specificity of 70% to detect its presence. Logistic regression analysis, including heart rhythm during the study and anticoagulant treatment, showed that CHA2DS2-VASc (OR = 1.5; CI95% = 1.1-1.9;  $p = 0.003$ ) and left atrial area  $>30\text{cm}^2$  (OR = 5.2; CI 95% = 1.7-16.0;  $p = 0.004$ ) were independent predictors of atrial thrombus presence.

**Conclusions:** The left atrial area is associated with the presence of atrial thrombus in patients with a history of AF independently of the CHA2DS2-VASc scale, heart rhythm during the study, and anticoagulant treatment. This parameter should be evaluated to be included in the cardioembolic risk scales.
